# Supplementary material for: Heterotrophic denitrification at extremely high salt and pH by haloalkaliphilic Gammaproteobacteria from hypersaline soda lakes
Source: PubMed Central journal article supplement — Extremophiles. 2008 May 2;12(5):619–25. doi: 10.1007/s00792-008-0166-6 (PMC2525850; doi:10.1007/s00792-008-0166-6), 2008-05-02
Supplement: 792_2008_166_MOESM1_ESM.pdf [file 792_2008_166_MOESM1_ESM.pdf]

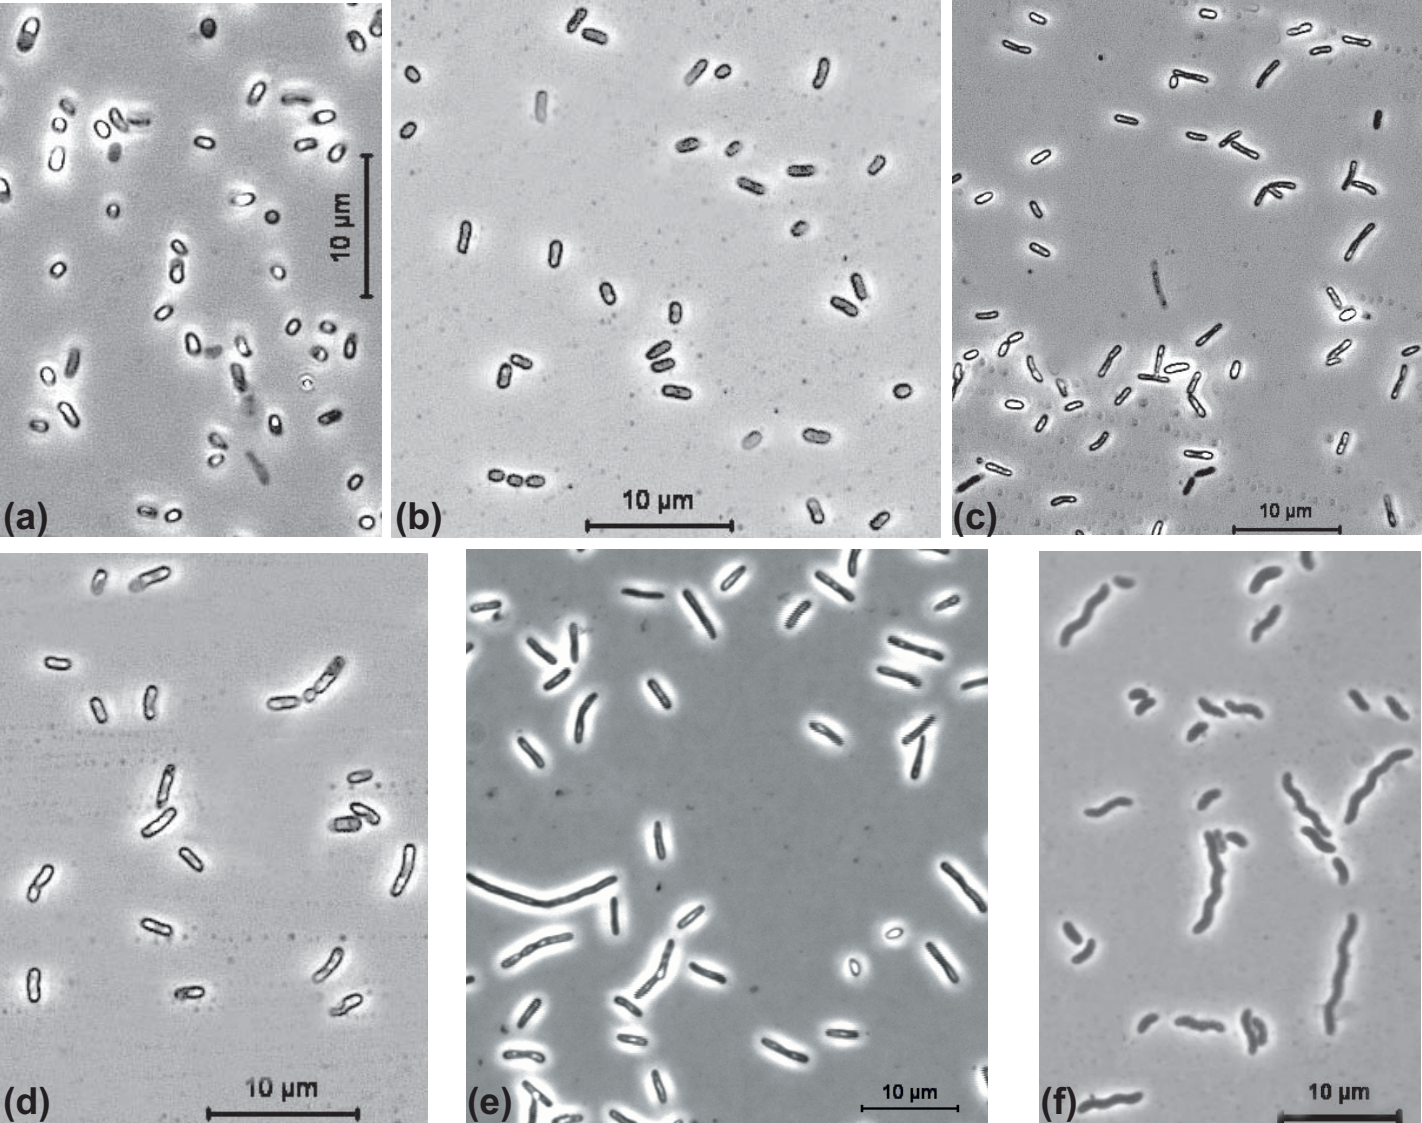

### Supplementary Figure 1

Cell morphology (phase contrast micrographs) of the denitrifying isolates from hypersaline soda lakes grown anaerobically with acetate and nitrate.

a, AGD 1; b, AGD 3; d, AGD 8-2; d, AGJ 1-3; e, AGDKS; f, AGDZ.
