# Supplementary material for: Heterotrophic denitrification at extremely high salt and pH by haloalkaliphilic Gammaproteobacteria from hypersaline soda lakes
Source: PubMed Central journal article supplement — Extremophiles. 2008 May 2;12(5):619–25. doi: 10.1007/s00792-008-0166-6 (PMC2525850; doi:10.1007/s00792-008-0166-6), 2008-05-02
Supplement: 792_2008_166_MOESM2_ESM.pdf [file 792_2008_166_MOESM2_ESM.pdf]

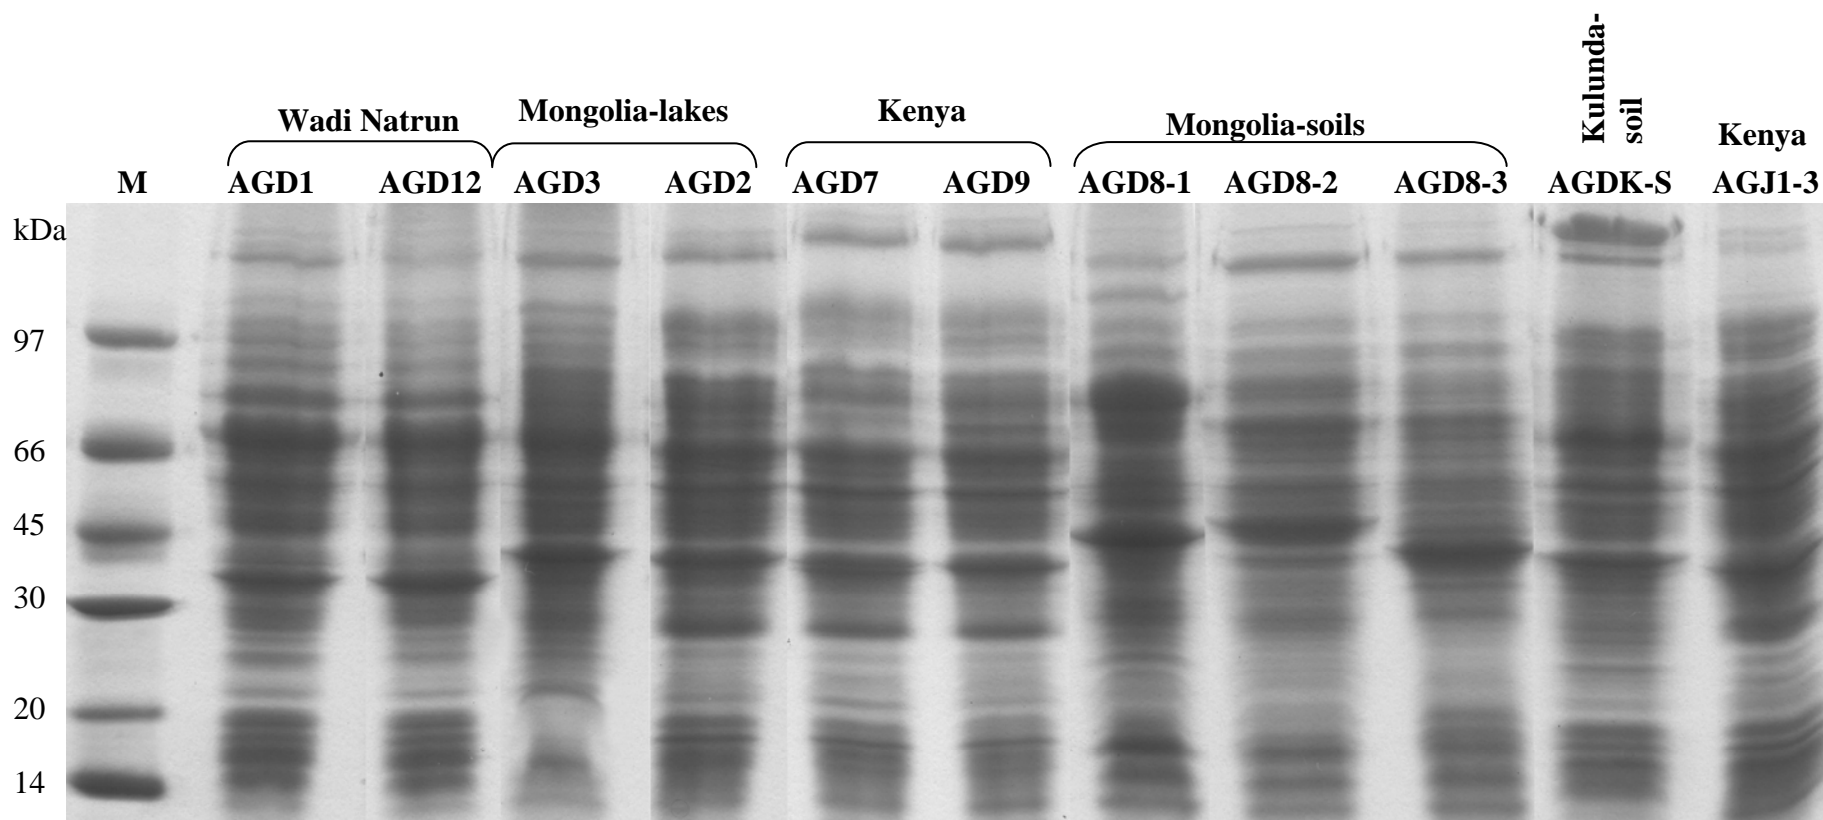

**Supplementary Figure 2**

5-18% gradient denaturing PAGE of total proteins of extremely natronophilic denitrifying *Halomonas* strains, grown at 2 M total  $\text{Na}^+$ , pH 10 anaerobically with acetate+nitrate

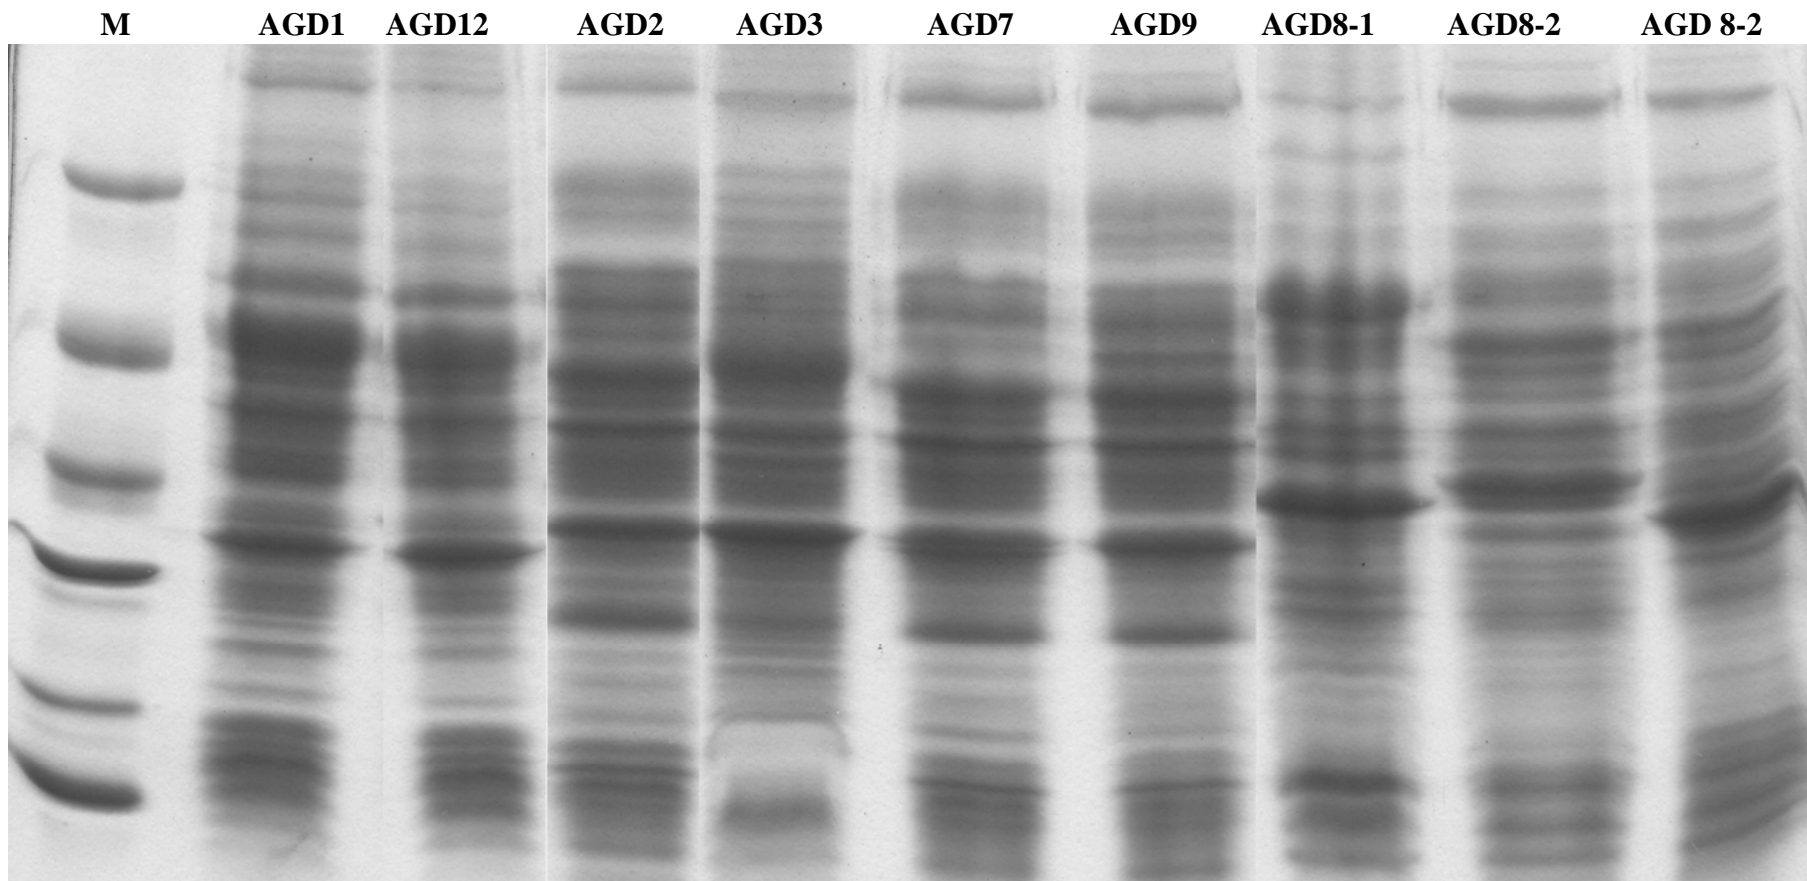

Gel2
